# Supplementary material
Source: Springer Nature journal article supplement (https://www.springermedizin.de/resource/supplementary/12888_2010_732_MOESM8_ESM.pdf/9477974)
Supplement: MOESM8 [file 9477974]

| <b>Barriers</b>                                                 | <b>Facilitators</b>                                                                                                             |
|-----------------------------------------------------------------|---------------------------------------------------------------------------------------------------------------------------------|
| Transport                                                       | Transport assistance: Reimbursement for travel costs, use private cab driver                                                    |
| Distrust and/or Fear of Research Concerns about Confidentiality | Use of psycho education group or theatre to disseminate information about the research area; clear information about the study. |
| Stigma of Mental Illness                                        | Avoid 'stigmatising' language                                                                                                   |
| Language Difficulties                                           | Bilingual Staff                                                                                                                 |
| Acceptance of Illness                                           | Inclusion of caregivers/family members                                                                                          |
| Inconvenience                                                   | Flexible meeting times and locations                                                                                            |
| Severity of Illness                                             |                                                                                                                                 |
| Immigration Status                                              |                                                                                                                                 |
| Fear of relapse or exacerbating illness                         |                                                                                                                                 |
